# Supplementary material for: Intratarget Microdosing for Deep Phenotyping of Multiple Drug Effects in the Live Brain
Source: PubMed Central journal article supplement (PMC8973214; doi:10.3389/fbioe.2022.855755), 2022-03-18
Supplement: DataSheet1.pdf [file DataSheet1.pdf]

**SUPPLEMENTAL FIGURES:**

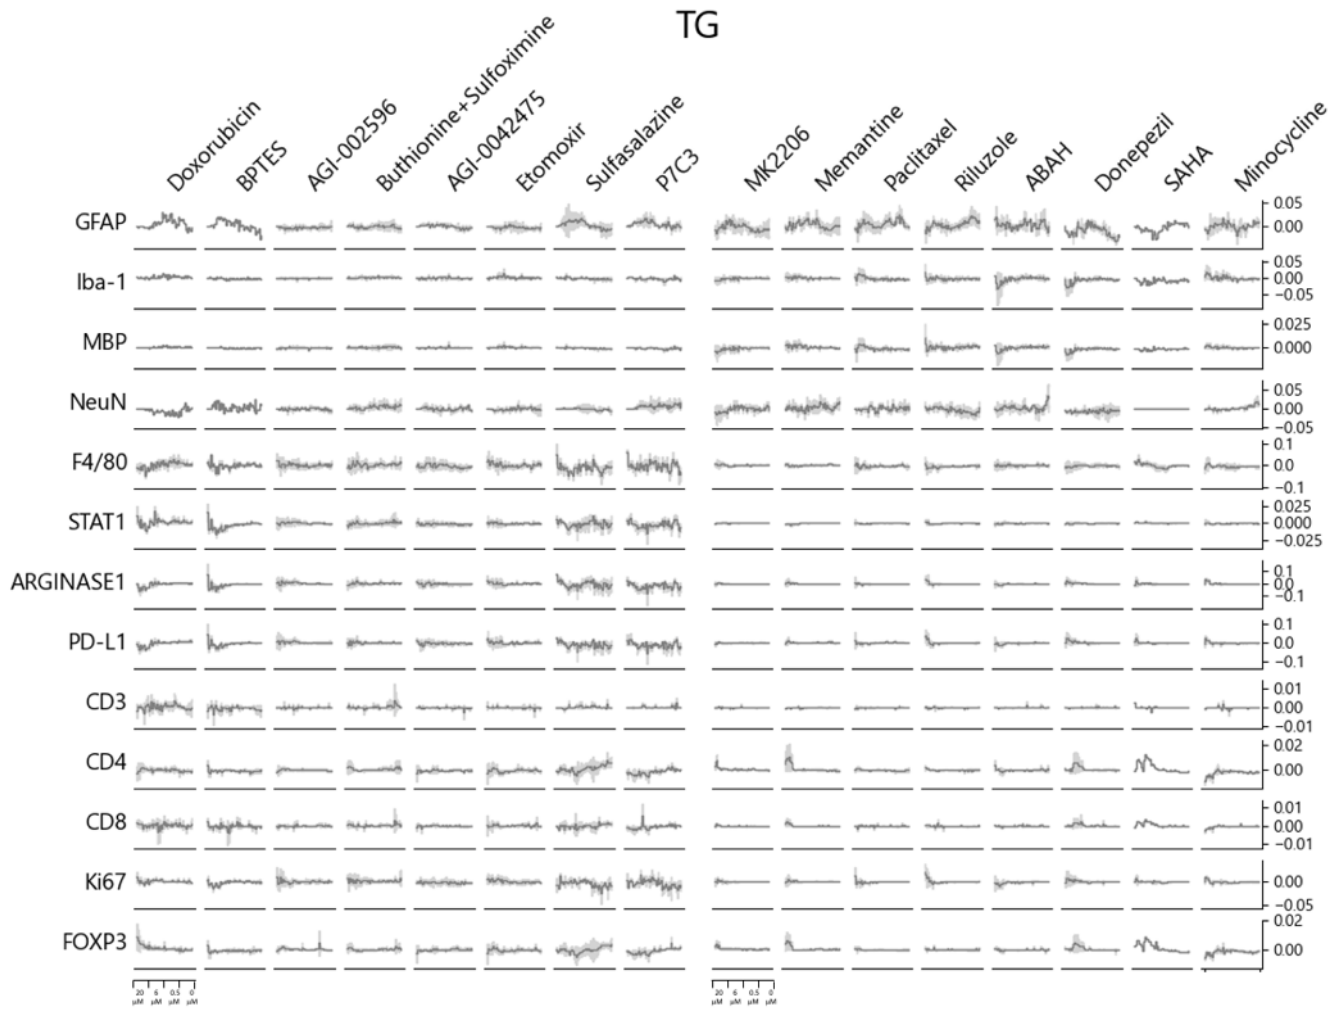

**Supplemental Figure 1:** Overview of PK/PD curves for 16 pharmacological agents in the TG mice across 13 biomarkers. All curves display fluorescent intensity for a given IF marker, and are averaged from 4-6 ROIs per drug. Values represent the net change of marker expression versus the control expression level.

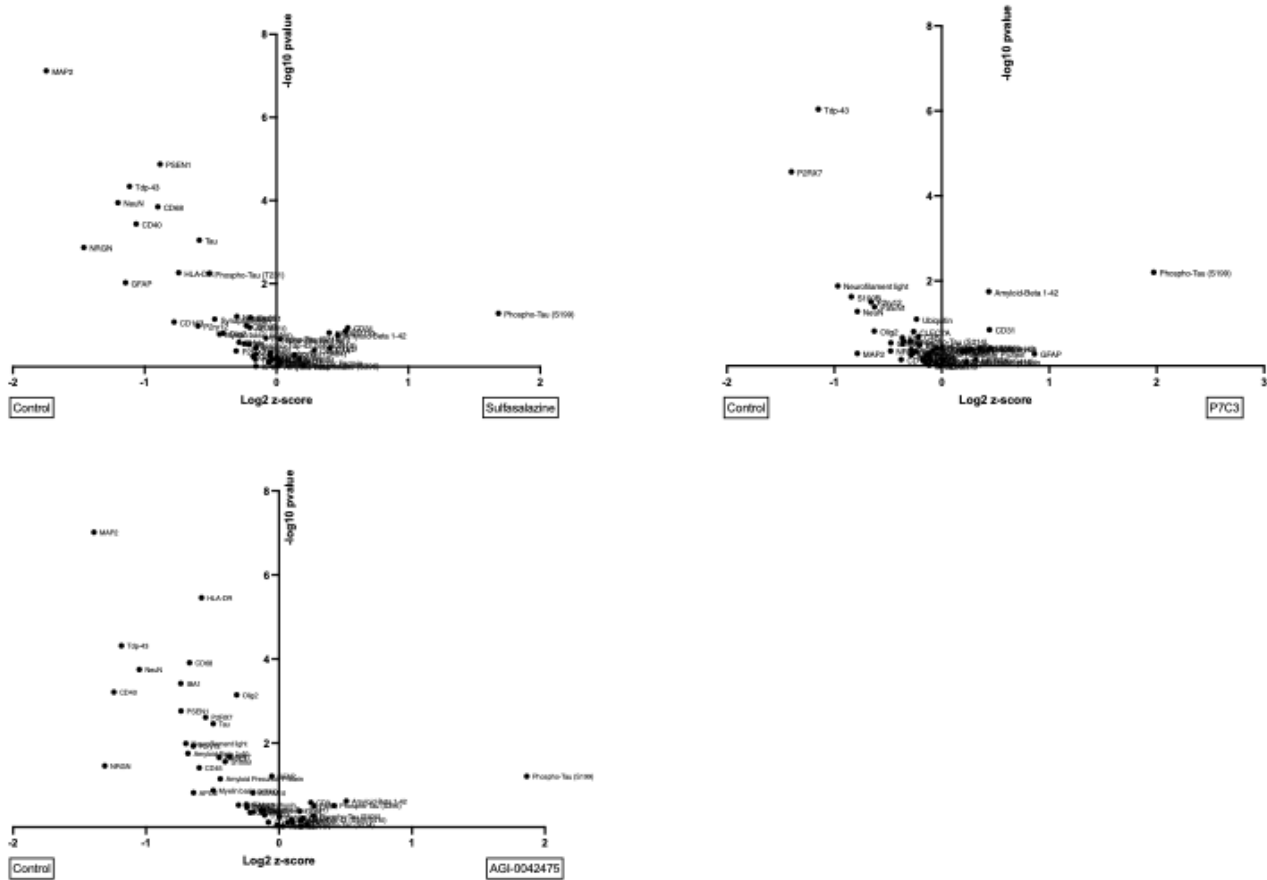

**Supplemental Figure 2:** Additional volcano plots showing differential protein expression in drug and control tissue regions. Each unit increase on x-axis represents a doubling in marker intensity. The y-axis shows the associated p-value ( $-\log_{10}$ ) across the biological replicate set of  $n=4-6$ .
